# Supplementary material
Source: PubMed Central journal article supplement (PMC8848203)
Supplement: jama-e220470-s001.pdf [file jama-e220470-s001.pdf]

## Supplemental Online Content

Accorsi EK, Britton A, Fleming-Dutra KE, et al. Association between 3 doses of mRNA COVID-19 vaccine and symptomatic infection caused by the SARS-CoV-2 Omicron and Delta variants. *JAMA*. Published online January 21, 2022. doi:10.1001/jama.2022.0470

**eTable 1.** S-gene target failure and variant lineages among 17,620 positive SARS-CoV-2 tests whole genome sequenced in the Increasing Community Access to Testing platform between December 10, 2021, and January 1, 2022

**eTable 2.** Cycle threshold (Ct) values among 23,391 positive SARS-CoV-2 tests performed in the Increasing Community Access to Testing platform between December 10, 2021, and January 1, 2022

This supplemental material has been provided by the authors to give readers additional information about their work.

**eTable 1. S-gene target failure and variant lineages among 17,620 positive SARS-CoV-2 tests whole genome sequenced in the Increasing Community Access to Testing platform between December 10, 2021, and January 1, 2022**

|                                          | Lineages B.1.1.529 and BA.1 (Omicron) <sup>a</sup> | Lineages B.1.617.2 and AY (Delta) <sup>b</sup> | Other lineages <sup>c</sup> |
|------------------------------------------|----------------------------------------------------|------------------------------------------------|-----------------------------|
| <b>S-gene target failure<sup>d</sup></b> | 6728                                               | 21                                             | 52                          |
| <b>Non-S-gene target failure</b>         | 1336                                               | 9369                                           | 114                         |
| <b>Total</b>                             | 8064                                               | 9390                                           | 166                         |

<sup>a</sup> Omicron lineages include B.1.1.529 and BA.1. No BA.2 lineages were identified among whole genome sequenced samples.

<sup>b</sup> Delta lineages included AY.1, AY.3, AY.3.1, AY.4, AY.4.2, AY.4.2.2, AY.4.2.3, AY.4.5, AY.5, AY.5.3, AY.7, AY.9.2, AY.13, AY.14, AY.16, AY.20, AY.25, AY.25.1, AY.26, AY.27, AY.33, AY.34, AY.34.1, AY.35, AY.36, AY.37, AY.39, AY.39.1, AY.39.2, AY.42, AY.43, AY.43.3, AY.44, AY.45, AY.46, AY.46.1, AY.46.2, AY.46.4, AY.46.6, AY.47, AY.49, AY.54, AY.58, AY.59, AY.64, AY.65, AY.73, AY.74, AY.75, AY.77, AY.78, AY.79, AY.83, AY.84, AY.85, AY.92, AY.98, AY.98.1, AY.99, AY.99.1, AY.99.2, AY.100, AY.102, AY.103, AY.105, AY.106, AY.107, AY.108, AY.109, AY.110, AY.111, AY.113, AY.114, AY.116.1, AY.117, AY.118, AY.119, AY.119.1, AY.120, AY.120.1, AY.120.2, AY.120.2.1, AY.121, AY.122, AY.122.1, AY.124, AY.125, AY.126, AY.127, B.1.617.2.

<sup>c</sup> Other lineages identified in this dataset included B, B.1, B.1.1, B.1.1.409, B.1.350, B.1.627, B.6, B.55, C.36.3.1.

<sup>d</sup> SARS-CoV-2 positive samples were considered to have S-gene target failure (SGTF) if they had Ct values for the *N* and *ORF1ab* genes, but not for the *S* gene, otherwise samples were considered not to have SGTF. SGTF was used as a proxy for the Omicron variant. Samples without SGTF were presumed to be Delta. Using this algorithm SGTF was 83.4% sensitive and 99.2% specific for the Omicron variant.

**eTable 2. Cycle threshold (Ct) values among 23,391 positive SARS-CoV-2 tests performed in the Increasing Community Access to Testing platform between December 10, 2021, and January 1, 2022**

| Ct Type | Variant | Group one <sup>a</sup> | Group one median Ct | Group two <sup>a</sup> | Group two median Ct | Q-value | Difference of medians (95% CI) <sup>b</sup> | Log difference in medians |
|---------|---------|------------------------|---------------------|------------------------|---------------------|---------|---------------------------------------------|---------------------------|
| N Gene  | Delta   | Three Doses            | 19.07               | Two Doses              | 17.52               | <0.001  | 1.56 (0.95, 2.07)                           | 0.09                      |
| N Gene  | Delta   | Three Doses            | 19.07               | Unvaccinated           | 18.28               | <0.001  | 0.80 (0.19, 1.33)                           | 0.04                      |
| N Gene  | Delta   | Two Doses              | 17.52               | Unvaccinated           | 18.28               | <0.001  | -0.76 (-1.08, -0.42)                        | -0.04                     |
| N Gene  | Omicron | Three Doses            | 19.35               | Two Doses              | 18.52               | <0.001  | 0.83 (0.51, 1.20)                           | 0.04                      |
| N Gene  | Omicron | Three Doses            | 19.35               | Unvaccinated           | 18.71               | 0.0017  | 0.65 (0.28, 1.03)                           | 0.03                      |
| N Gene  | Omicron | Two Doses              | 18.52               | Unvaccinated           | 18.71               | 0.0031  | -0.19 (-0.49, 0.09)                         | -0.01                     |
| ORF1ab  | Delta   | Three Doses            | 18.70               | Two Doses              | 17.28               | <0.001  | 1.43 (0.92, 2.07)                           | 0.08                      |
| ORF1ab  | Delta   | Three Doses            | 18.70               | Unvaccinated           | 17.84               | <0.001  | 0.87 (0.28, 1.51)                           | 0.05                      |
| ORF1ab  | Delta   | Two Doses              | 17.28               | Unvaccinated           | 17.84               | <0.001  | -0.56 (-0.95, -0.30)                        | -0.03                     |
| ORF1ab  | Omicron | Three Doses            | 19.25               | Two Doses              | 18.40               | <0.001  | 0.85 (0.45, 1.26)                           | 0.05                      |
| ORF1ab  | Omicron | Three Doses            | 19.25               | Unvaccinated           | 18.58               | <0.001  | 0.67 (0.23, 1.12)                           | 0.04                      |
| ORF1ab  | Omicron | Two Doses              | 18.40               | Unvaccinated           | 18.58               | 0.0101  | -0.18 (-0.49, 0.13)                         | -0.01                     |
| S Gene  | Delta   | Three Doses            | 23.62               | Two Doses              | 20.24               | <0.001  | 3.38 (2.74, 3.98)                           | 0.15                      |
| S Gene  | Delta   | Three Doses            | 23.62               | Unvaccinated           | 19.58               | <0.001  | 4.05 (3.46, 4.61)                           | 0.19                      |
| S Gene  | Delta   | Two Doses              | 20.24               | Unvaccinated           | 19.58               | 0.0023  | 0.67 (0.29, 1.04)                           | 0.03                      |

<sup>a</sup> Three doses were from persons  $\geq 14$  days post dose 3 with  $\geq 6$  months between doses 2 and 3. Two doses were from persons  $\geq 6$  months after dose 2 (i.e., eligible for a booster dose).

<sup>b</sup> The 95% confidence interval for the difference of the medians of the two groups was calculated via bootstrapping.
